# Supplementary material
Source: PubMed Central journal article supplement (PMC2878511)

## Supplementary Data

### Incorporation of tyrosine and glutamine residues into the soluble guanylate cyclase heme distal pocket alters NO and O<sub>2</sub> binding

Emily R. Derbyshire, Sarah Deng and Michael A. Marletta

**Fig. S1.** Effect of GTP and YC-1 on the temperature-dependent equilibrium between 5- and 6-coordinate Fe<sup>II</sup>-NO complexes in sGC  $\alpha$ 1 $\beta$ 1 I145Y and  $\alpha$ 1 $\beta$ 1 F74Y. Spectra (500 - 650 nm) are shown for 5 (black solid line), 30 (black dashed line) and 45 °C (gray solid line) for  $\alpha$ 1 $\beta$ 1 I145Y and for 5 (black solid line), 20 (black dashed line) and 30 °C (gray solid line) for  $\alpha$ 1 $\beta$ 1 F74Y.

**Fig. S2.** Activity of sGC  $\beta$ 1 distal pocket mutants in the absence and presence of NO (100  $\mu$ M DEA/NO) and YC-1 (150  $\mu$ M) at 37 °C. The bars, from left to right, refer to wild-type  $\alpha$ 1 $\beta$ 1,  $\alpha$ 1 $\beta$ 1 V5Y,  $\alpha$ 1 $\beta$ 1 F74Y,  $\alpha$ 1 $\beta$ 1 I145Y and  $\alpha$ 1 $\beta$ 1 I149Y. NO-stimulated activity and YC-1 synergism is reduced in all of the mutants.

**Fig. S3.** Characterization of sGC  $\alpha$ 1 $\beta$ 1 L9W/I145Y. **(A)** Electronic absorption spectra of Fe<sup>II</sup>-unligated (black solid line), Fe<sup>II</sup>-CO (black dashed line) and Fe<sup>II</sup>-NO (gray solid line) complexes at 20 °C. **(B)** Activity of wild-type  $\alpha$ 1 $\beta$ 1 (black bars) and  $\alpha$ 1 $\beta$ 1 L9W/I145Y (white bars) in the presence and absence of NO, CO, and YC-1 at 37 °C.

**Fig. S4.** Activity of wild-type  $\alpha$ 1 $\beta$ 1 (black bars) and  $\alpha$ 1 $\beta$ 1 I145Y/I149Q (white bars). Reduced protein was assayed in the unligated state and after exposure to NO, CO and O<sub>2</sub> at 25 °C.  $\alpha$ 1 $\beta$ 1 I145Y/I149Q was monitored by electronic absorption spectroscopy to ensure the Soret absorbance maximum shifted after addition of each ligand. The Fe<sup>II</sup> protein was oxidized with potassium ferricyanide (1 mM) and then the enzyme was assayed in the presence and absence of sodium cyanide (10 mM) at 25 °C.

Table S1. Activity of various  $\alpha 1\beta 1$  sGC mutants at 37 °C<sup>a</sup>

| sGC             | Ligand | Specific Activity<br>(nmol cGMP min <sup>-1</sup> mg <sup>-1</sup> ) |              |
|-----------------|--------|----------------------------------------------------------------------|--------------|
|                 |        | - YC-1                                                               | + YC-1       |
| wt              | -      | 185 ± 0                                                              | 985 ± 125    |
|                 | NO     | 13282 ± 477                                                          | 26655 ± 5344 |
|                 | CO     | 199 ± 19                                                             | 6976 ± 899   |
| $\beta 1$ I5Y   | -      | 33 ± 12                                                              | 161 ± 65     |
|                 | NO     | 1588 ± 588                                                           | 5162 ± 2845  |
|                 | CO     | 43 ± 0.3                                                             | 423 ± 90     |
| $\beta 1$ F74Y  | -      | 433 ± 3                                                              | 1070 ± 157   |
|                 | NO     | 5004 ± 137                                                           | 5079 ± 1142  |
|                 | CO     | 143 ± 52                                                             | 1253 ± 398   |
| $\beta 1$ I145Y | -      | 94 ± 11                                                              | 181 ± 67     |
|                 | NO     | 1197 ± 68                                                            | 3216 ± 448   |
|                 | CO     | 105 ± 5                                                              | 142 ± 24     |
| $\beta 1$ I149Y | -      | 139 ± 0                                                              | 245 ± 42     |
|                 | NO     | 416 ± 23                                                             | 1829 ± 351   |
|                 | CO     | 250 ± 82                                                             | 185 ± 61     |

<sup>a</sup>Values for sGC determined in duplicate. The concentration of YC-1 was 150  $\mu$ M.

Figure S1

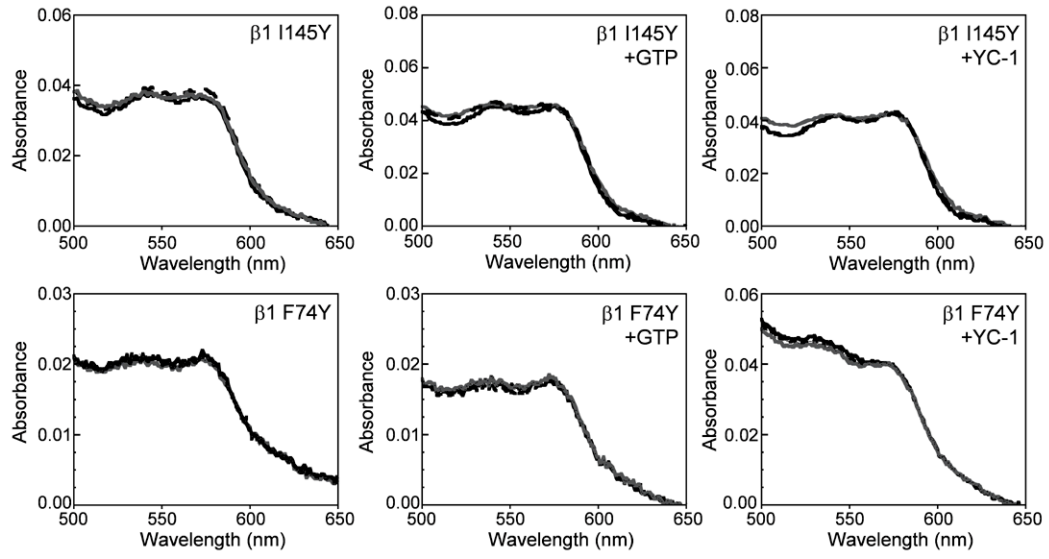

Figure S2

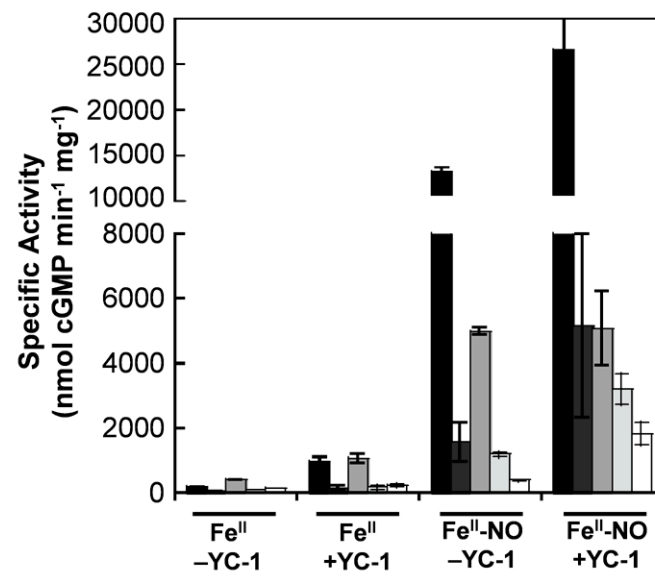

Figure S3

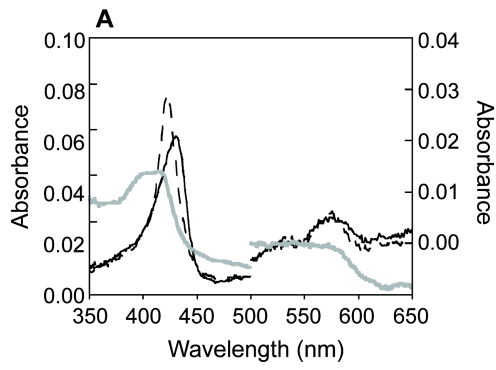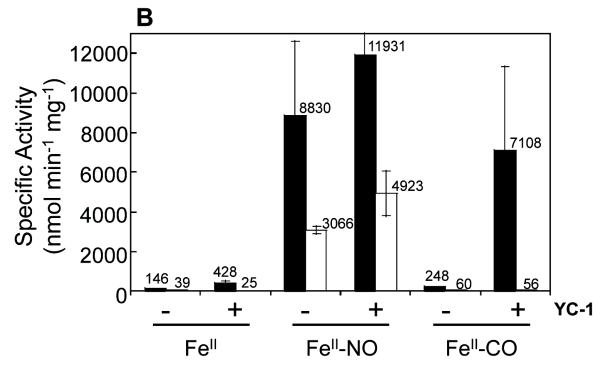

Figure S4

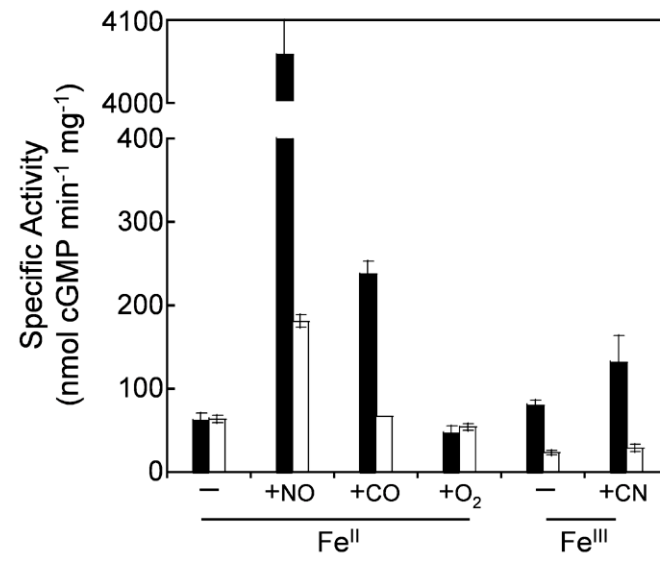

Supplement: supp_M109.098269_M098269_SI.pdf [file supp_M109.098269_M098269_SI.pdf]
